# Supplementary material
Source: Springer Nature journal article supplement (https://www.springermedizin.de/resource/supplementary/12884_2012_620_MOESM3_ESM.pdf/9457878)
Supplement: MOESM3 [file 9457878]

*Appendix 2 Figure 2: Facebook Page Profile Picture*

A silhouette of a pregnant woman wearing a hat, standing on a beach with her hand on her hip, looking out at the ocean during a sunset. The background shows palm trees and a building on the left, and the sun is low on the horizon, creating a warm, golden glow.

**Are you expecting your first baby?**  
***Sleep, Mood, & Motherhood***

**Would you like to learn about:**

- Your baby's sleep
- Sleep changes in pregnancy
- What to expect from sleep and feeding changes in the first few months

***For more information,  
please contact Liora on 9114 0495 or [liora.kempler@sydney.edu.au](mailto:liora.kempler@sydney.edu.au)***

Version 1, 29 August, 2012
